# Supplementary material for: Reticulated carbon foam derived from a sponge-like natural product as a high-performance anode in microbial fuel cells
Source: Royal Society of Chemistry journal article supplement (doi:10.1039/c2jm33733a), 2012-01-01
Supplement: c2jm33733a.pdf [file c2jm33733a.pdf]

## Reticulated Carbon Foam derived from sponge-like natural product as high-performance anode in microbial fuel cells

Shuiliang Chen, Qin Liu, Guanghua He, Yan Zhou, Muddasir Hanif, Xinwen Peng, Suqin Wang, Haoqing Hou\*

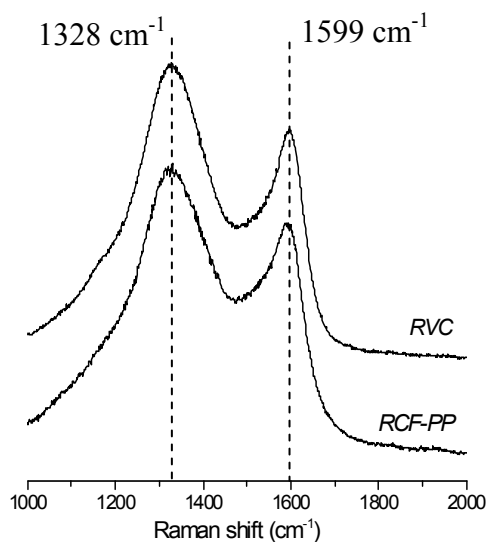

Fig. S1 Raman spectra of RCF-PP carbonized at 900 °C and commercial RVC

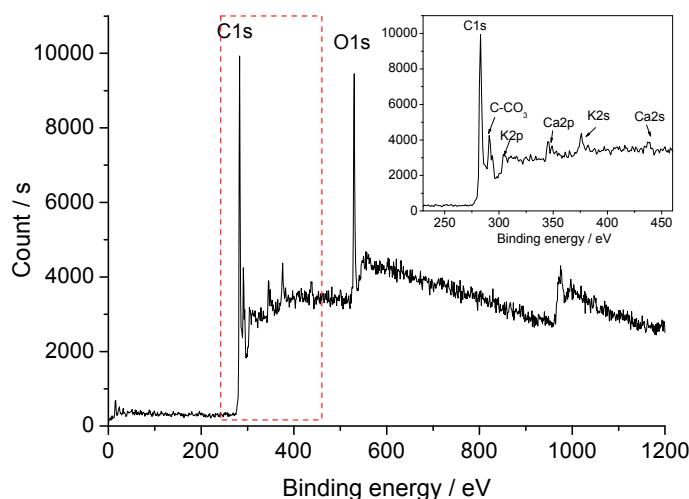

Fig. S2 XPS spectra of RCF-PP, insert was magnified from selected region.

Department of Chemistry and Chemical Engineering, Jiangxi Normal University, 330022, Nanchang, China.

\* E-mail: [hqhou01@yahoo.com](mailto:hqhou01@yahoo.com); Fax: (+86) 791-88120536, Tel: (+86) 791-881205740

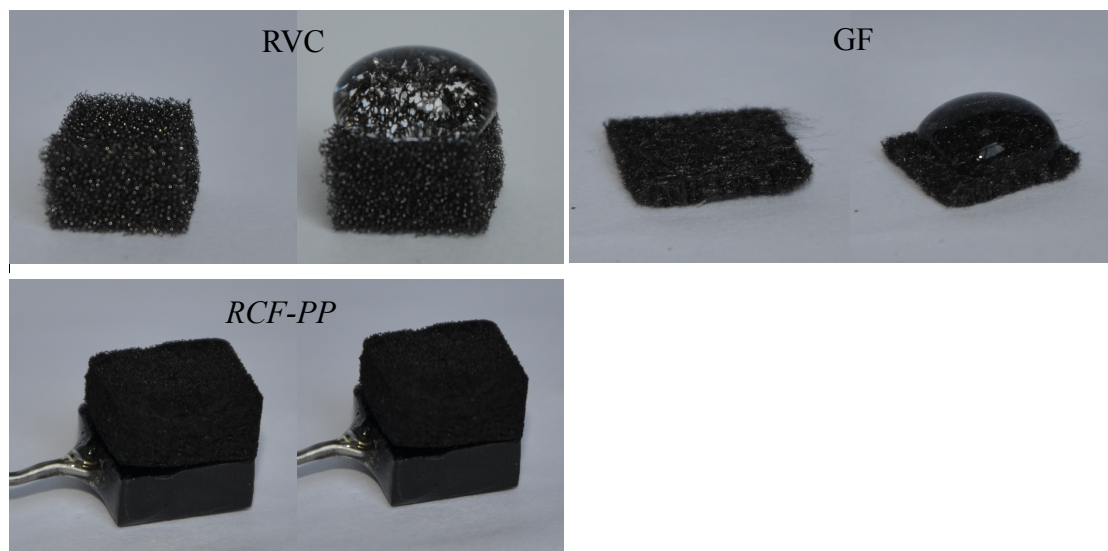

Fig.S3 Photos of carbon samples before and after dropping water

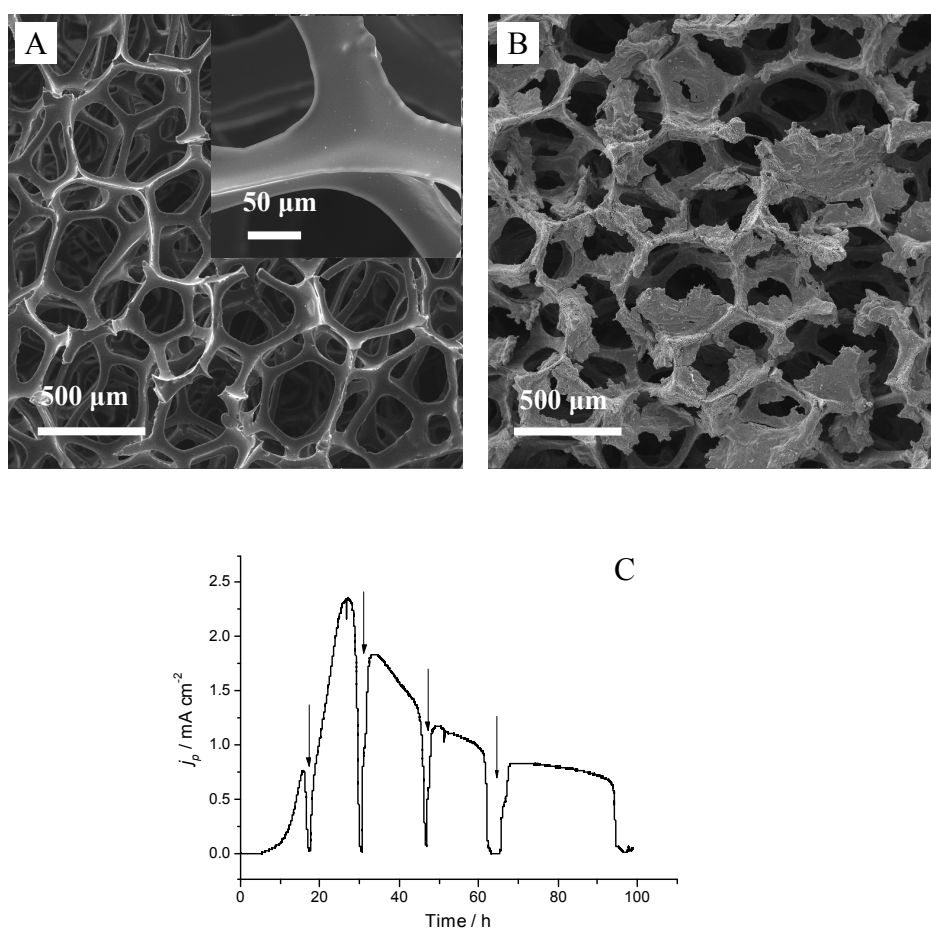

Fig. S4 SEM images of RVC electrode A) before and B) after biofilm growth; C) Bioelectrocatalytic current generation of RVC electrode; the arrows indicate the replenishment of media with 20 mM acetate substrate.
